# Supplementary material
Source: PubMed Central journal article supplement (PMC4914658)
Supplement: AAC.02816-15_zac007165321so1.pdf [file AAC.02816-15_zac007165321so1.pdf]

Supplemental Fig. 1. The enzymatic activity of TcIMPDPH and the inhibition of TcIMPDPH by mycophenolic acid

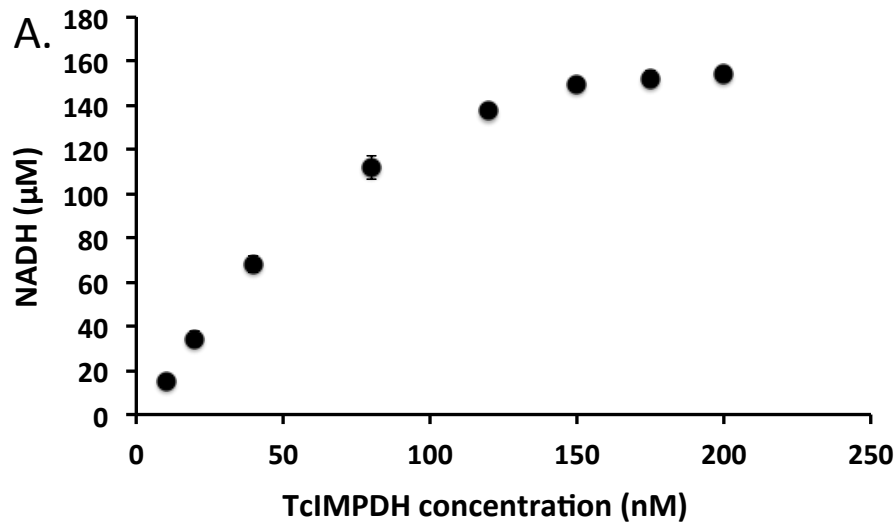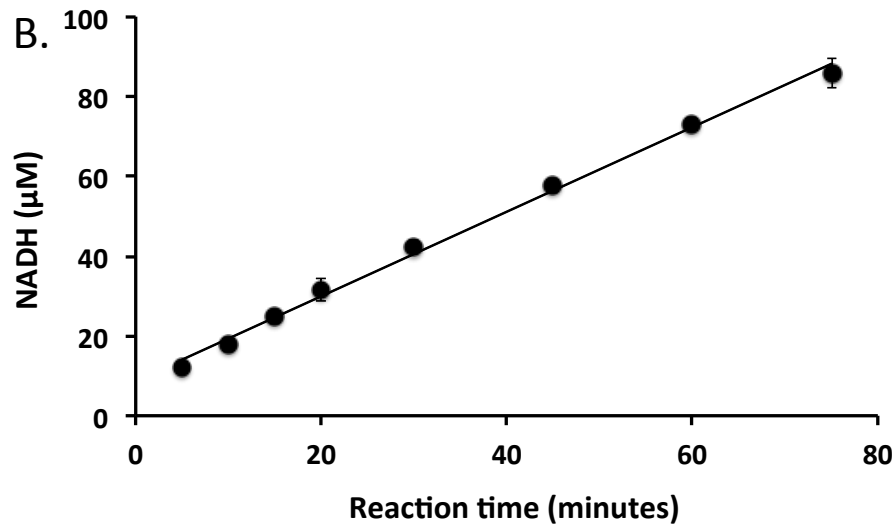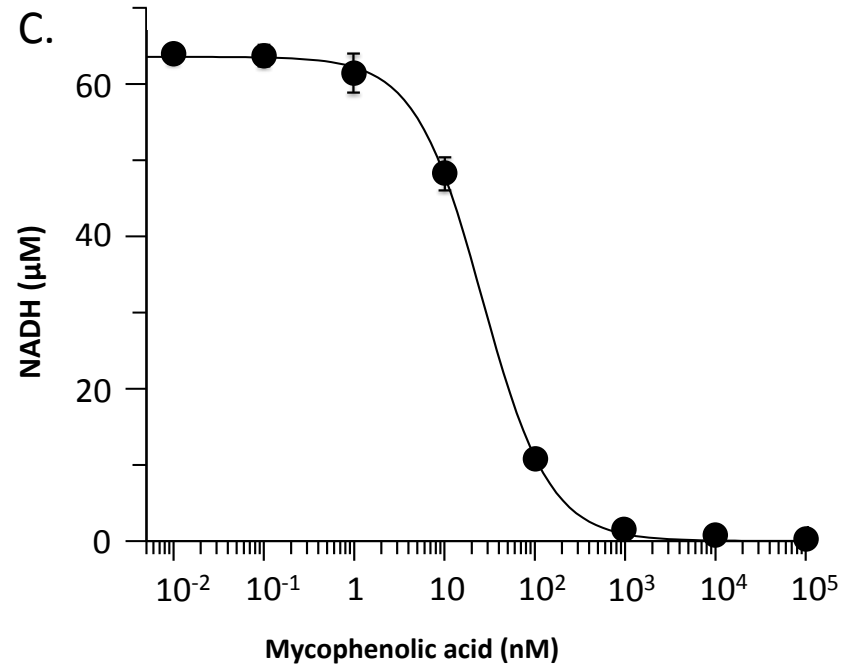

**Supplemental Figure 1. The enzymatic activity of TcIMPDPH and the inhibition of TcIMPDPH by mycophenolic acid**

The activity of IMPDPH was evaluated, based on the detection of the enzymatic product NADH, as the increasing absorbance at 340 nm. The data represent the mean values of three independent experiments.

(A) The dose-dependent assay of TcIMPDPH. The assay was carried out for 60 minutes in standard IMPDPH buffer with various concentrations of enzyme.

(B) The time-course assay of TcIMPDPH. The assay was carried out for various reaction times in standard IMPDPH buffer with a TcIMPDPH concentration of 40 nM.

(C) MPA has been known as a specific noncompetitive inhibitor of IMPDPH. A dose-dependent assay of MPA was carried out in the presence of 250 µM IMP, 800 µM β-NAD<sup>+</sup>, and 40 nM TcIMPDPH. The data represent the mean values of three independent experiments.

## Supplemental Fig. 2. The expression profile and localization of TcIMPDH

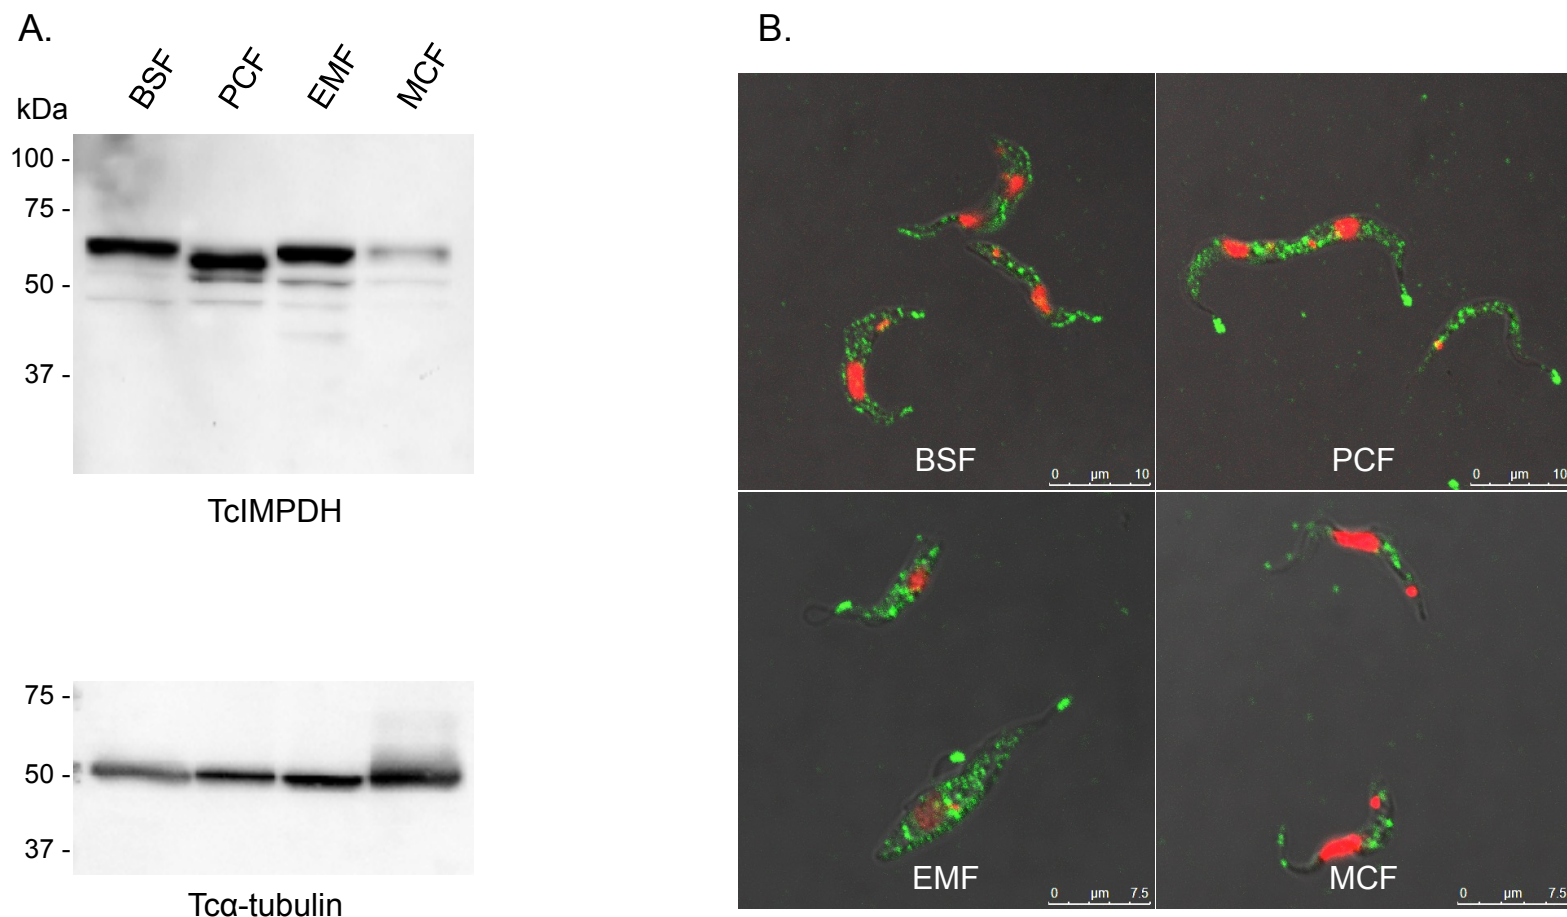

### Supplemental Fig. 2. The expression profile and localization of TcIMPDH

(A) Western blotting was performed with 5  $\mu$ g of total cell protein extracted from BSF, PCF, EMF, and MCF using anti-TcIMPDH and anti-Tc  $\alpha$ -tubulin antibodies.

(B) Indirect immunofluorescence staining using anti-TcIMPDH antibody was observed by confocal laser scanning microscopy. Nucleolus and kinetoplast DNAs were subjected to Hoechst 33342 staining and are shown in red. The images were constructed by merging a fluorescence image and a differential interference contrast image. Each of the microscopy images was captured using the same photomultiplier tube gain and voltage.
